# Supplementary material for: Fine Flounder (Paralichthys adspersus) Microbiome Showed Important Differences between Wild and Reared Specimens
Source: Front Microbiol. 2017 Feb 24;8:271. doi: 10.3389/fmicb.2017.00271 (PMC5324718; doi:10.3389/fmicb.2017.00271)
Supplement: Supplementary file 1 [file Data_Sheet_1.XLSX]

## Sheet: Table S1
Fine Flounder (Paralichthys adspersus) Microbiome Showed Important Differences Between Wild and Reared Specimens
Ramirez,C., Romero, J.
Supplementary Table S1: Details of primers
Sample	bacterial forward	ion torrent L inter primer	golay barcode	spacer	16S rRNA primers (341)
WF1	A341F_BACT_A_21	CCATCTCATCCCTGCGTGTCTCCGACTCAG	GATCTGCGATCC	GT	CCTACGGGAGGCAGCAG
WF2	A341F_BACT_A_23	CCATCTCATCCCTGCGTGTCTCCGACTCAG	CAAACAACAGCT	GT	CCTACGGGAGGCAGCAG
WF3	A341F_BACT_A_24	CCATCTCATCCCTGCGTGTCTCCGACTCAG	GCAACACCATCC	GT	CCTACGGGAGGCAGCAG
WF4	A341F_BACT_A_25	CCATCTCATCCCTGCGTGTCTCCGACTCAG	GCGATATATCGC	GT	CCTACGGGAGGCAGCAG
WF5	A341F_BACT_A_26	CCATCTCATCCCTGCGTGTCTCCGACTCAG	CGAGCAATCCTA	GT	CCTACGGGAGGCAGCAG
AF1	A341F_BACT_A_27	CCATCTCATCCCTGCGTGTCTCCGACTCAG	AGTCGTGCACAT	GT	CCTACGGGAGGCAGCAG
AF2	A341F_BACT_A_28	CCATCTCATCCCTGCGTGTCTCCGACTCAG	GTATCTGCGCGT	GT	CCTACGGGAGGCAGCAG
AF5	A341F_BACT_A_30	CCATCTCATCCCTGCGTGTCTCCGACTCAG	CAAATTCGGGAT	GT	CCTACGGGAGGCAGCAG
AF3	A341F_BACT_A_32	CCATCTCATCCCTGCGTGTCTCCGACTCAG	AGTTACGAGCTA	GT	CCTACGGGAGGCAGCAG
AF4	A341F_BACT_A_33	CCATCTCATCCCTGCGTGTCTCCGACTCAG	GCATATGCACTG	GT	CCTACGGGAGGCAGCAG
	bacterial reverse
	518R_BACT_P1	CCTCTCTATGGGCAGTCGGTGAT	not applicable	CC	ATTACCGCGGCTGCTGG

## Sheet: Table S2
Fine Flounder (Paralichthys adspersus) Microbiome Showed Important Differences Between Wild and Reared Specimens
Ramirez,C., Romero, J.
Supplementary Table S2: The Nearest Sequenced Taxon Index (NSTI) scores as reported by the PICRUst
Sample	Metric	Value
WF1	Weighted NSTI	0.125354
WF2	Weighted NSTI	0.0694075
WF3	Weighted NSTI	0.0652721
WF4	Weighted NSTI	0.0763661
WF5	Weighted NSTI	0.069827
AF1	Weighted NSTI	0.0848288
AF2	Weighted NSTI	0.154749
AF3	Weighted NSTI	0.100408
AF4	Weighted NSTI	0.0697192
AF5	Weighted NSTI	0.0924785
	mean	0.0908409
	sd	0.0290901

## Sheet: Table S3
Fine Flounder (Paralichthys adspersus) Microbiome Showed Important Differences Between Wild and Reared Specimens
Ramirez,C., Romero, J.
Supplementary Table S3: Predicted functions metabolic associated bacterial microbiota (relative abundance %)
		Class	A	A	A	A	A	W	W	W	W	W	FDR
		ID	AF1	AF2	AF3	AF5	AF4	WF1	WF2	WF3	WF4	WF5
		UNINTEGRATED	41.73	44.27	41.98	41.80	41.44	39.92	42.48	42.09	40.44	40.24
Metabolism	Carbohydrate metabolism	ko00010: Glycolysis_Gluconeogenesis	0.63	0.6	0.56	0.72	0.74	0.62	0.51	0.48	0.62	0.64	0.149816
Metabolism	Carbohydrate metabolism	ko00020: Citrate_cycle_TCA_cycle_	0.66	0.27	0.58	0.49	0.66	0.55	0.64	0.6	0.67	0.7	0.231621
Metabolism	Carbohydrate metabolism	ko00030: Pentose_phosphate_pathway	0.68	0.97	0.61	0.87	0.74	0.7	0.46	0.46	0.59	0.6	0.0286002	*
Metabolism	Carbohydrate metabolism	ko00040: Pentose_and_glucuronate_interconversions	0.3	0.62	0.32	0.36	0.36	0.32	0.25	0.23	0.35	0.36	0.196398
Metabolism	Carbohydrate metabolism	ko00051: Fructose_and_mannose_metabolism	0.33	0.61	0.37	0.67	0.49	0.46	0.26	0.28	0.35	0.36	0.0762843
Metabolism	Carbohydrate metabolism	ko00052: Galactose_metabolism	0.26	0.71	0.26	0.41	0.36	0.29	0.15	0.14	0.25	0.27	0.0763592
Metabolism	Carbohydrate metabolism	ko00053: Ascorbate_and_aldarate_metabolism	0.16	0.22	0.19	0.17	0.2	0.2	0.22	0.24	0.25	0.26	0.0162315	*
Metabolism	Carbohydrate metabolism	ko00500: Starch_and_sucrose_metabolism	0.28	0.63	0.29	0.46	0.38	0.38	0.19	0.17	0.29	0.32	0.1056
Metabolism	Carbohydrate metabolism	ko00520: Amino_sugar_and_nucleotide_sugar_metabolism	0.42	0.64	0.41	0.5	0.49	0.47	0.31	0.27	0.37	0.38	0.038659	*
Metabolism	Carbohydrate metabolism	ko00562: Inositol_phosphate_metabolism	0.19	0.19	0.23	0.14	0.16	0.16	0.17	0.16	0.22	0.26	0.645376
Metabolism	Carbohydrate metabolism	ko00620: Pyruvate_metabolism	0.71	0.61	0.65	0.74	0.76	0.7	0.73	0.72	0.72	0.73	0.389326
Metabolism	Carbohydrate metabolism	ko00630: Glyoxylate_and_dicarboxylate_metabolism	0.43	0.38	0.49	0.36	0.42	0.46	0.53	0.66	0.56	0.59	0.00693674	*
Metabolism	Carbohydrate metabolism	ko00640: Propanoate_metabolism	0.59	0.32	0.75	0.44	0.62	0.61	0.89	0.9	0.78	0.77	0.0271748	*
Metabolism	Carbohydrate metabolism	ko00650: Butanoate_metabolism	0.59	0.42	0.69	0.47	0.6	0.59	0.77	0.85	0.76	0.79	0.0159574	*
Metabolism	Carbohydrate metabolism	ko00660: C5_Branched_dibasic_acid_metabolism	1.07	1.23	1.02	0.98	1.05	1.13	1.06	0.9	1.07	1.05	0.638234
Metabolism	Energy metabolism	ko00190: Oxidative_phosphorylation	0.37	0.19	0.3	0.26	0.3	0.33	0.28	0.26	0.28	0.27	> 0.9999
Metabolism	Energy metabolism	ko00195: Photosynthesis	0.27	0.28	0	0.42	0	0.53	0.2	0.16	0.21	0.19	0.569918
Metabolism	Energy metabolism	ko00196: Photosynthesis_antenna_proteins	0.01	0.04	0	0.11	0	0.26	0	0	0.02	0	0.675357
Metabolism	Energy metabolism	ko00680: Methane_metabolism	0.25	0.31	0.23	0.29	0.25	0.26	0.25	0.23	0.25	0.25	0.278767
Metabolism	Energy metabolism	ko00710: Carbon_fixation_in_photosynthetic_organisms	0.66	0.77	0.54	0.83	0.63	0.66	0.5	0.46	0.54	0.53	0.042481	*
Metabolism	Energy metabolism	ko00720: Carbon_fixation_pathways_in_prokaryotes	0.65	0.4	0.66	0.59	0.64	0.66	0.82	0.72	0.71	0.68	0.0483032	*
Metabolism	Energy metabolism	ko04122: Sulfur_relay_system	0.6	0.42	0.66	0.85	0.73	0.78	0.77	0.67	0.71	0.71	0.336195
Metabolism	Energy metabolism	ko00910: Nitrogen_metabolism	0.31	0.28	0.34	0.36	0.33	0.35	0.41	0.38	0.38	0.38	0.00977395	*
Metabolism	Lipid metabolism	ko00061: Fatty_acid_biosynthesis	1.12	0.65	1	1.02	1.04	0.97	0.94	0.93	0.86	0.87	0.55436
Metabolism	Lipid metabolism	ko00062: Fatty_acid_elongation_in_mitochondria	0	0	0	0	0	0	0	0	0	0
Metabolism	Lipid metabolism	ko00071: Fatty_acid_metabolism	0.53	0.23	0.8	0.34	0.55	0.63	1.02	1.11	0.91	0.91	0.00994932	*
Metabolism	Lipid metabolism	ko00072: Synthesis_and_degradation_of_ketone_bodies	0.53	0.2	0.98	0.25	0.68	0.67	1.21	1.53	1.18	1.24	0.012742	*
Metabolism	Lipid metabolism	ko00100: Steroid_biosynthesis	0.01	0	0	0.02	0.01	0.02	0.03	0.01	0.01	0.01	0.182257
Metabolism	Lipid metabolism	ko00121: Secondary_bile_acid_biosynthesis	0.18	0.66	0.03	0.53	0.29	0.13	0.07	0.22	0.04	0.02	0.0788038
Metabolism	Lipid metabolism	ko00140: Steroid_hormone_biosynthesis	0.01	0.03	0.02	0.01	0.02	0.03	0	0.02	0.02	0.02	> 0.9999
Metabolism	Lipid metabolism	ko00561: Glycerolipid_metabolism	0.28	0.4	0.29	0.32	0.33	0.29	0.27	0.24	0.28	0.28	0.0520428
Metabolism	Lipid metabolism	ko00564: Glycerophospholipid_metabolism	0.35	0.26	0.34	0.35	0.36	0.31	0.32	0.29	0.29	0.29	0.136585
Metabolism	Lipid metabolism	ko00565: Ether_lipid_metabolism	0	0.01	0	0.07	0.02	0.04	0	0	0	0	0.455366
Metabolism	Lipid metabolism	ko00590: Arachidonic_acid_metabolism	0.08	0.04	0	0.19	0	0.13	0	0.16	0.14	0.14	0.287196
Metabolism	Lipid metabolism	ko00591: Linoleic_acid_metabolism	0.16	0.23	0.34	0.16	0.19	0.13	0.11	0.19	0.23	0.25	0.45438
Metabolism	Lipid metabolism	ko00600: Sphingolipid_metabolism	0.03	0.41	0.07	0.06	0.05	0.06	0.01	0.02	0.04	0.05	0.258846
Metabolism	Lipid metabolism	ko01040: Biosynthesis_of_unsaturated_fatty_acids	0.36	0.18	0.49	0.25	0.3	0.47	0.7	0.57	0.53	0.52	0.00605063	*
Metabolism	Nucleotide metabolism	ko00230: Purine_metabolism	0.46	0.39	0.39	0.46	0.43	0.44	0.38	0.35	0.39	0.38	0.114379
Metabolism	Nucleotide metabolism	ko00240: Pyrimidine_metabolism	0.56	0.52	0.43	0.6	0.53	0.5	0.4	0.35	0.41	0.4	0.014367	*
Metabolism	Amino acid metabolism	ko00250: Alanine_aspartate_and_glutamate_metabolism	0.82	0.78	0.74	0.93	0.78	0.84	0.81	0.71	0.81	0.8	0.694732
Metabolism	Amino acid metabolism	ko00260: Glycine_serine_and_threonine_metabolism	0.59	0.52	0.6	0.51	0.59	0.61	0.62	0.59	0.64	0.66	0.0262943	*
Metabolism	Amino acid metabolism	ko00270: Cysteine_and_methionine_metabolism	0.63	0.56	0.53	0.74	0.67	0.59	0.45	0.47	0.52	0.54	0.0385622*
Metabolism	Amino acid metabolism	ko00280: Valine_leucine_and_isoleucine_degradation	0.56	0.2	0.82	0.27	0.57	0.59	0.98	1.04	0.9	0.9	0.0194586	*
Metabolism	Amino acid metabolism	ko00290: Valine_leucine_and_isoleucine_biosynthesis	1.18	1.35	1.05	1.19	1.12	1.17	1.02	1	1.11	1.15	0.183008
Metabolism	Amino acid metabolism	ko00300: Lysine_biosynthesis	0.88	0.81	0.72	0.91	0.82	0.75	0.66	0.59	0.66	0.64	0.00382583	*
Metabolism	Amino acid metabolism	ko00310: Lysine_degradation	0.33	0.1	0.48	0.16	0.34	0.41	0.68	0.66	0.58	0.57	0.00714797	*
Metabolism	Amino acid metabolism	ko00330: Arginine_and_proline_metabolism	0.47	0.48	0.48	0.49	0.46	0.5	0.46	0.43	0.48	0.48	0.653853
Metabolism	Amino acid metabolism	ko00340: Histidine_metabolism	0.77	0.61	0.71	0.89	0.74	0.73	0.76	0.62	0.73	0.71	0.525674
Metabolism	Amino acid metabolism	ko00350: Tyrosine_metabolism	0.31	0.22	0.39	0.38	0.37	0.31	0.36	0.38	0.39	0.42	0.329588
Metabolism	Amino acid metabolism	ko00360: Phenylalanine_metabolism	0.24	0.16	0.3	0.24	0.23	0.23	0.28	0.36	0.35	0.37	0.043507*	*
Metabolism	Amino acid metabolism	ko00380: Tryptophan_metabolism	0.33	0.14	0.52	0.21	0.35	0.41	0.66	0.66	0.61	0.61	0.00807908	*
Metabolism	Amino acid metabolism	ko00400: Phenylalanine_tyrosine_and_tryptophan_biosynthesis	0.6	0.53	0.51	0.57	0.53	0.56	0.52	0.48	0.51	0.5	0.143701
Metabolism	Metabolism of other amino acids	ko00410: beta_Alanine_metabolism	0.49	0.2	0.74	0.35	0.51	0.63	0.96	1.05	0.83	0.82	0.00821731	*
Metabolism	Metabolism of other amino acids	ko00430: Taurine_and_hypotaurine_metabolism	0.35	0.28	0.39	0.37	0.37	0.37	0.33	0.47	0.37	0.39	0.289894
Metabolism	Metabolism of other amino acids	ko00440: Phosphonate_and_phosphinate_metabolism	0.07	0.17	0.13	0.14	0.09	0.1	0.11	0.13	0.1	0.09	0.485178
Metabolism	Metabolism of other amino acids	ko00450: Selenocompound_metabolism	0.67	0.59	0.63	0.79	0.77	0.7	0.46	0.51	0.58	0.63	0.0834722
Metabolism	Metabolism of other amino acids	ko00460: Cyanoamino_acid_metabolism	0.31	0.6	0.37	0.48	0.34	0.36	0	0	0.37	0.39	0.101624
Metabolism	Metabolism of other amino acids	ko00471: D_Glutamine_and_D_glutamate_metabolism	1.03	0.79	0.84	1.04	0.93	0.9	0.75	0.64	0.71	0.66	0.0213416	*
Metabolism	Metabolism of other amino acids	ko00472: D_Arginine_and_D_ornithine_metabolism	0.2	0.55	0.09	0.1	0.32	0.2	0.02	0.04	0.12	0.13	0.139068
Metabolism	Metabolism of other amino acids	ko00473: D_Alanine_metabolism	0.92	0.92	0.71	0.96	0.94	0.72	0.55	0.5	0.59	0.55	0.000797136	*
Metabolism	Metabolism of other amino acids	ko00480: Glutathione_metabolism	0.47	0.25	0.63	0.42	0.41	0.64	0.67	0.68	0.64	0.62	0.00862838	*
Metabolism	Glycan biosynthesis and metabolism	ko00510: N_Glycan_biosynthesis	0.01	0.03	0	0.02	0.01	0.03	0	0	0.02	0.02	> 0.9999
Metabolism	Glycan biosynthesis and metabolism	ko00511: Other_glycan_degradation	0.14	1.58	0.15	0.16	0.16	0.13	0.05	0.03	0.11	0.15	0.264151
Metabolism	Glycan biosynthesis and metabolism	ko00531: Glycosaminoglycan_degradation	0.02	0.22	0.06	0.03	0.03	0.04	0.03	0.01	0.02	0.03	0.260016
Metabolism	Glycan biosynthesis and metabolism	ko00540: Lipopolysaccharide_biosynthesis	0.57	0.17	0.44	0.14	0.21	0.49	0.66	0.56	0.47	0.42	0.05277
Metabolism	Glycan biosynthesis and metabolism	ko00550: Peptidoglycan_biosynthesis	0.99	0.86	0.78	1.05	0.89	0.9	0.84	0.73	0.73	0.69	0.0594843
Metabolism	metabolism of cofactors and vitamins	ko00130: Ubiquinone_and_other_terpenoid_quinone_biosynthesis	0.42	0.16	0.34	0.29	0.34	0.5	0.44	0.35	0.41	0.39	0.0616914
Metabolism	metabolism of cofactors and vitamins	ko00670: One_carbon_pool_by_folate	0.89	0.86	0.81	1.09	0.88	0.92	0.83	0.73	0.85	0.83	0.229132
Metabolism	metabolism of cofactors and vitamins	ko00730: Thiamine_metabolism	0.8	0.85	0.7	1.14	0.92	0.82	0.62	0.59	0.65	0.64	0.0319802	*
Metabolism	metabolism of cofactors and vitamins	ko00740: Riboflavin_metabolism	0.61	0.34	0.51	0.64	0.56	0.62	0.62	0.48	0.54	0.51	0.723741
Metabolism	metabolism of cofactors and vitamins	ko00750: Vitamin_B6_metabolism	0.62	0.47	0.49	0.53	0.53	0.59	0.58	0.5	0.51	0.5	0.812948
Metabolism	metabolism of cofactors and vitamins	ko00760: Nicotinate_and_nicotinamide_metabolism	0.54	0.39	0.55	0.59	0.51	0.61	0.65	0.56	0.58	0.56	0.0810345
Metabolism	metabolism of cofactors and vitamins	ko00770: Pantothenate_and_CoA_biosynthesis	0.89	0.72	0.74	0.82	0.85	0.84	0.7	0.7	0.74	0.73	0.172176
Metabolism	metabolism of cofactors and vitamins	ko00780: Biotin_metabolism	0.61	0.37	0.53	0.55	0.52	0.78	0.75	0.61	0.61	0.55	0.0421908	*
Metabolism	metabolism of cofactors and vitamins	ko00785: Lipoic_acid_metabolism	0.78	0.45	0.69	0.68	0.81	0.87	0.74	0.6	0.76	0.75	0.440657
Metabolism	metabolism of cofactors and vitamins	ko00790: Folate_biosynthesis	0.72	0.52	0.68	0.74	0.7	0.74	0.72	0.61	0.64	0.62	0.902679
Metabolism	metabolism of cofactors and vitamins	ko00830: Retinol_metabolism	0.09	0.05	0.13	0.06	0.11	0.11	0.15	0.14	0.14	0.15	0.0171029	*
Metabolism	metabolism of cofactors and vitamins	ko00860: Porphyrin_and_chlorophyll_metabolism	0.44	0.53	0.37	0.6	0.44	0.56	0.33	0.36	0.37	0.37	0.211581
Metabolism	Metabolism of terpenoids and polyketides	ko00253: Tetracycline_biosynthesis	0.51	0.22	0.44	0.55	0.52	0.53	0	0	0.35	0	0.0637406
Metabolism	Metabolism of terpenoids and polyketides	ko00281: Geraniol_degradation	0.68	0.08	1.19	0.26	0.6	0.9	1.82	1.86	1.41	1.37	0.00799286	*
Metabolism	Metabolism of terpenoids and polyketides	ko00523: Polyketide_sugar_unit_biosynthesis	0	0.25	0	0	0.14	0.21	0.08	0.13	0.17	0.18	0.208738
Metabolism	Metabolism of terpenoids and polyketides	ko00900: Terpenoid_backbone_biosynthesis	0.73	0.5	0.65	0.73	0.7	0.73	0.63	0.61	0.67	0.69	0.935717
Metabolism	Metabolism of terpenoids and polyketides	ko00903: Limonene_and_pinene_degradation	0.57	0.25	0.97	0.39	0.66	0.79	1.36	1.26	1.1	1.08	0.00795711	*
Metabolism	Metabolism of terpenoids and polyketides	ko00906: Carotenoid_biosynthesis	0.06	0.02	0.06	0.06	0.07	0.12	0	0.02	0.04	0.03	0.606103
Metabolism	Metabolism of terpenoids and polyketides	ko00908: Zeatin_biosynthesis	0.24	0.2	0.2	0.25	0.23	0.23	0.19	0.16	0.18	0.17	0.0435982	*
Metabolism	Metabolism of terpenoids and polyketides	ko01051: Biosynthesis_of_ansamycins	1.32	2.82	1.21	2.28	1.43	1.37	0.84	0.88	1.01	1.04	0.0441616	*
Metabolism	Metabolism of terpenoids and polyketides	ko01053: Biosynthesis_of_siderophore_group_nonribosomal_peptides	0.06	0.04	0.12	0.04	0.08	0.07	0.07	0.05	0.08	0.08	0.903231
Metabolism	Metabolism of terpenoids and polyketides	ko01055: Biosynthesis_of_vancomycin_group_antibiotics	0.93	1.26	0.55	0.61	0.67	1.07	0.26	0.47	0.87	0.95	0.702388
Metabolism	Biosynthesis of other secondary metabolites	ko00311: Penicillin_and_cephalosporin_biosynthesis	0.09	0.03	0.23	0.09	0.12	0.13	0.07	0.2	0.16	0.2	0.357426
Metabolism	Biosynthesis of other secondary metabolites	ko00521: Streptomycin_biosynthesis	0.61	0.81	0.5	0.57	0.52	0.7	0.3	0.37	0.62	0.68	0.515082
Metabolism	Biosynthesis of other secondary metabolites	ko00941: Flavonoid_biosynthesis	0.03	0.07	0.03	0.05	0.03	0.05	0	0	0.02	0.03	0.114196
Metabolism	Biosynthesis of other secondary metabolites	ko00960: Tropane_piperidine_and_pyridine_alkaloid_biosynthesis	0.25	0.17	0.27	0.33	0.25	0.26	0.25	0.27	0.3	0.31	0.418004
Metabolism	Xenobiotics biodegradation and metabolism	ko00361: Chlorocyclohexane_and_chlorobenzene_degradation	0.17	0.08	0.24	0.07	0.12	0.11	0.1	0.18	0.22	0.25	0.428091
Metabolism	Xenobiotics biodegradation and metabolism	ko00362: Benzoate_degradation	0.26	0.15	0.42	0.17	0.29	0.22	0.32	0.51	0.39	0.42	0.1352
Metabolism	Xenobiotics biodegradation and metabolism	ko00363: Bisphenol_degradation	0.29	0.35	0.64	0.24	0.36	0.3	0.3	0.36	0.43	0.51	0.961516
Metabolism	Xenobiotics biodegradation and metabolism	ko00364: Fluorobenzoate_degradation	0.05	0.02	0.28	0.04	0.05	0.07	0.03	0.12	0.13	0.17	0.775072
Metabolism	Xenobiotics biodegradation and metabolism	ko00621: Dioxin_degradation	0.28	0.22	0.16	0.28	0.29	0.14	0.03	0.21	0.07	0.07	0.00790324	*
Metabolism	Xenobiotics biodegradation and metabolism	ko00622: Xylene_degradation	0.17	0.15	0.08	0	0.17	0	0.02	0	0.05	0.06	0.037114	*
Metabolism	Xenobiotics biodegradation and metabolism	ko00623: Toluene_degradation	0.37	0.05	0.33	0.14	0.26	0.28	0.29	0.28	0.32	0.34	0.27016
Metabolism	Xenobiotics biodegradation and metabolism	ko00624: Polycyclic_aromatic_hydrocarbon_degradation	0.15	0.11	0	0.17	0.18	0.16	0.1	0.19	0.19	0.25	0.207551
Metabolism	Xenobiotics biodegradation and metabolism	ko00625: Chloroalkane_and_chloroalkene_degradation	0.35	0.36	0.54	0.44	0.49	0.4	0.48	0.51	0.56	0.58	0.187741
Metabolism	Xenobiotics biodegradation and metabolism	ko00626: Naphthalene_degradation	0.32	0.24	0.52	0.36	0.47	0.36	0.56	0.6	0.52	0.53	0.0771949
Metabolism	Xenobiotics biodegradation and metabolism	ko00627: Aminobenzoate_degradation	0.23	0.14	0.4	0.19	0.26	0.23	0.3	0.46	0.34	0.38	0.131822
Metabolism	Xenobiotics biodegradation and metabolism	ko00633: Nitrotoluene_degradation	0.16	0.08	0.14	0.27	0.15	0.12	0.15	0.19	0.12	0.12	0.569976
Metabolism	Xenobiotics biodegradation and metabolism	ko00642: Ethylbenzene_degradation	0.31	0.26	0	0.33	0.44	0	0.27	0.25	0.25	0.24	0.479735
Metabolism	Xenobiotics biodegradation and metabolism	ko00643: Styrene_degradation	0.19	0.11	0.28	0.17	0.15	0.23	0.31	0.3	0.3	0.3	0.00947748	*
Metabolism	Xenobiotics biodegradation and metabolism	ko00791: Atrazine_degradation	0.17	0.24	0.22	0.1	0.15	0.35	0.36	0.33	0.33	0.35	0.000182354	*
Metabolism	Xenobiotics biodegradation and metabolism	ko00930: Caprolactam_degradation	0.54	0.12	1	0.19	0.43	0.75	1.44	1.45	1.11	1.07	0.00833545	*
Metabolism	Xenobiotics biodegradation and metabolism	ko00980: Metabolism_of_xenobiotics_by_cytochrome_P450	0.31	0.11	0.52	0.18	0.28	0.42	0.53	0.56	0.5	0.49	0.0173792	*
Metabolism	Xenobiotics biodegradation and metabolism	ko00983: Drug_metabolism_other_enzymes	0.48	0.81	0.44	0.68	0.57	0.44	0.36	0.32	0.47	0.49	0.0432774	*
Genetic Information Processing	Translation	ko00970: Aminoacyl_tRNA_biosynthesis	0.9	0.79	0.72	0.97	0.83	0.81	0.67	0.61	0.66	0.63	0.0176906	*
Genetic Information Processing	Translation	ko03008: Ribosome_biogenesis_in_eukaryotes	0.04	0.02	0.03	0.03	0.03	0.03	0.04	0.03	0.04	0.04	0.172003
Genetic Information Processing	Translation	ko03010: Ribosome	0.76	0.58	0.6	0.79	0.7	0.68	0.57	0.48	0.55	0.52	0.0470155	*
Genetic Information Processing	Translation	ko03013: RNA_transport	0.04	0.05	0.04	0.05	0.04	0.05	0.05	0.04	0.03	0.02	0.370555
Genetic Information Processing	Transcription	ko03020: RNA_polymerase	0.47	0.54	0.37	0.54	0.48	0.4	0.24	0.35	0.31	0.34	0.00581933	*
Genetic Information Processing	Folding, sorting and degradation	ko03018: RNA_degradation	0.32	0.23	0.26	0.33	0.28	0.32	0.26	0.23	0.26	0.25	0.427289
Genetic Information Processing	Folding, sorting and degradation	ko03060: Protein_export	0.7	0.55	0.59	0.65	0.7	0.7	0.66	0.54	0.63	0.6	0.773866
Genetic Information Processing	Folding, sorting and degradation	ko04141: Protein_processing_in_endoplasmic_reticulum	0.01	0.01	0.01	0.02	0.01	0.02	0.01	0.01	0.02	0.01	0.544737
Genetic Information Processing	Replication and repair	ko03030: DNA_replication	0.59	0.47	0.46	0.62	0.57	0.52	0.45	0.41	0.45	0.44	0.0453255	*
Genetic Information Processing	Replication and repair	ko03410: Base_excision_repair	0.53	0.43	0.45	0.47	0.52	0.5	0.42	0.4	0.51	0.53	0.811565
Genetic Information Processing	Replication and repair	ko03420: Nucleotide_excision_repair	0.37	0.32	0.29	0.4	0.36	0.32	0.25	0.24	0.29	0.3	0.024414	*
Genetic Information Processing	Replication and repair	ko03430: Mismatch_repair	0.82	0.68	0.62	0.88	0.77	0.7	0.6	0.54	0.59	0.58	0.0224051	*
Genetic Information Processing	Replication and repair	ko03440: Homologous_recombination	0.7	0.57	0.57	0.75	0.65	0.68	0.6	0.51	0.55	0.52	0.146829
Genetic Information Processing	Replication and repair	ko03450: Non_homologous_end_joining	0.11	0.01	0.09	0.03	0.08	0.06	0.06	0.1	0.12	0.15	0.222256
Environmental Information Processing	Signal transduction	ko02020: Two_component_system	0.24	0.29	0.29	0.2	0.26	0.26	0.28	0.33	0.27	0.28	0.214843
Environmental Information Processing	Membrane transport	ko02010: ABC_transporters	0.47	0.65	0.48	0.57	0.53	0.46	0.43	0.53	0.52	0.54	0.295592
Environmental Information Processing	Membrane transport	ko02060: Phosphotransferase_system_PTS_	0.21	0.23	0.14	0.42	0.39	0.2	0.1	0.11	0.11	0.09	0.0269001	*
Environmental Information Processing	Membrane transport	ko03070: Bacterial_secretion_system	0.38	0.24	0.51	0.32	0.36	0.41	0.46	0.5	0.42	0.41	0.139023
Cellular Processes	Cell motillity	ko02030: Bacterial_chemotaxis	0.84	1.49	0.9	0.49	0.91	0.71	0.8	0.99	0.77	0.81	0.529552
Cellular Processes	Cell motillity	ko02040: Flagellar_assembly	0.52	1.08	0.43	0.23	0.51	0.34	0.32	0.44	0.38	0.4	0.248587
Cellular Processes	Cell growth and death	ko04112: Cell_cycle_Caulobacter	0.75	0.64	0.66	0.76	0.68	0.69	0.59	0.57	0.57	0.55	0.017014	*
Cellular Processes	Transport and catabolism	ko04146: Peroxisome	0.17	0.11	0.17	0.11	0.15	0.2	0.26	0.27	0.22	0.22	0.00127375	*

## Sheet: Table S4
Fine Flounder (Paralichthys adspersus) Microbiome Showed Important Differences Between Wild and Reared Specimens
Ramirez,C., Romero, J.
Supplementary Table S4:Ingredients and nutrients of the diet
Crude Protein %	54
Crude fat %	18
Carbohydrates %	11
Ash %	9.1
Fiber	0.9
Gross Energy MJ/kg	22.0
Digestible Energy MJ/kg	19.9

## Sheet: Table S5
Fine Flounder (Paralichthys adspersus) Microbiome Showed Important Differences Between Wild and Reared Specimens
Ramirez,C., Romero, J.
Supplementary Table S5: Details sequencing results
Sample	Reads	%GC	Number of filtered reads
WF1	8013	54	4703
WF2	17269	52	8300
WF3	15933	53	7359
WF4	12841	53	7080
WF5	16562	55	8070
AF1	15523	54	7871
AF2	15397	55	8488
AF3	27264	55	12022
AF4	17377	54	8504
AF5	37488	55	15533
